# Supplementary material for: In silico optimization of a guava antimicrobial peptide enables combinatorial exploration for peptide design
Source: PubMed Central journal article supplement (PMC5902452; doi:10.1038/s41467-018-03746-3), 2018-04-16
Supplement: 41467_2018_3746_MOESM1_ESM.pdf [file 41467_2018_3746_MOESM1_ESM.pdf]

## Supplementary Information

### ***In silico* optimization of a guava antimicrobial peptide enables combinatorial exploration for peptide design**

William F. Porto<sup>a,b,c</sup>, Luz Irazazabal<sup>a,d</sup>, Eliane S. F. Alves<sup>d</sup>, Suzana M. Ribeiro<sup>b</sup>, Carolina O. Matos<sup>e</sup>, Allan S. Pires<sup>a</sup>, Isabel C. M. Fensterseifer<sup>a,d</sup>, Vivian J. Miranda<sup>a</sup>, Evan F. Haney<sup>f</sup>, Vincent Humblot<sup>g</sup>, Marcelo D. T. Torres<sup>h,i,j</sup>, Robert E. W. Hancock<sup>f</sup>, Luciano M. Liao<sup>e</sup>, Ali Ladram<sup>k</sup>, Timothy K. Lu<sup>h,i</sup>, Cesar de la Fuente-Nunez<sup>h,i,\*</sup> and Octavio L. Franco<sup>a,b,d\*</sup>

<sup>a</sup> Centro de Análises Proteômicas e Bioquímicas, Pós-Graduação em Ciências Genômicas e Biotecnologia Universidade Católica de Brasília, Brasília-DF, Brazil.

<sup>b</sup> S-Inova Biotech, Pós-graduação em Biotecnologia, Universidade Católica Dom Bosco, Campo Grande, MS, Brazil.

<sup>c</sup> Porto Reports, Brasília-DF, Brazil

<sup>d</sup> Molecular Pathology Post-graduate Program, University of Brasília, Brasília, Distrito Federal, Brazil.

<sup>e</sup> Laboratório de RMN, Instituto de Química, Universidade Federal de Goiás, Goiânia, GO, Brazil.

<sup>f</sup> Centre for Microbial Diseases and Immunity Research, University of British Columbia, 2259 Lower Mall Research Station, Vancouver, British Columbia, Canada V6T 1Z4.

<sup>g</sup> Sorbonne Universités, UPMC Univ Paris 06, UMR 7197, Laboratoire de Réactivité de Surface (LRS), F-75005, Paris, France.

<sup>h</sup> Synthetic Biology Group, MIT Synthetic Biology Center; The Center for Microbiome Informatics and Therapeutics; Research Laboratory of Electronics, Department of Biological Engineering, and Department of Electrical Engineering and Computer Science, Massachusetts Institute of Technology, Cambridge, MA, United States of America.

<sup>i</sup> Broad Institute of MIT and Harvard, Cambridge, Massachusetts, United States of America.

<sup>j</sup> Centro de Ciências Naturais e Humanas, Universidade Federal do ABC, Santo André, São Paulo, Brazil.

<sup>k</sup> Sorbonne Universités, UPMC Univ Paris 06, CNRS, Institut de Biologie Paris-Seine (IBPS), Biogenèse des Signaux Peptidiques (BIOSIPE), F-75005 Paris, France.

\*Corresponding authors:

Cesar de la Fuente-Nunez - [cfuente@mit.edu](mailto:cfuente@mit.edu), Phone number: +1 617 324 4227

Octavio Luiz Franco - [ocfranco@gmail.com](mailto:ocfranco@gmail.com), Phone number: +55 61 34487167/ +55 61 34487220

Fax number: + 55 61 33474797, website: <http://www.capb.com.br>

## Supplementary Figures

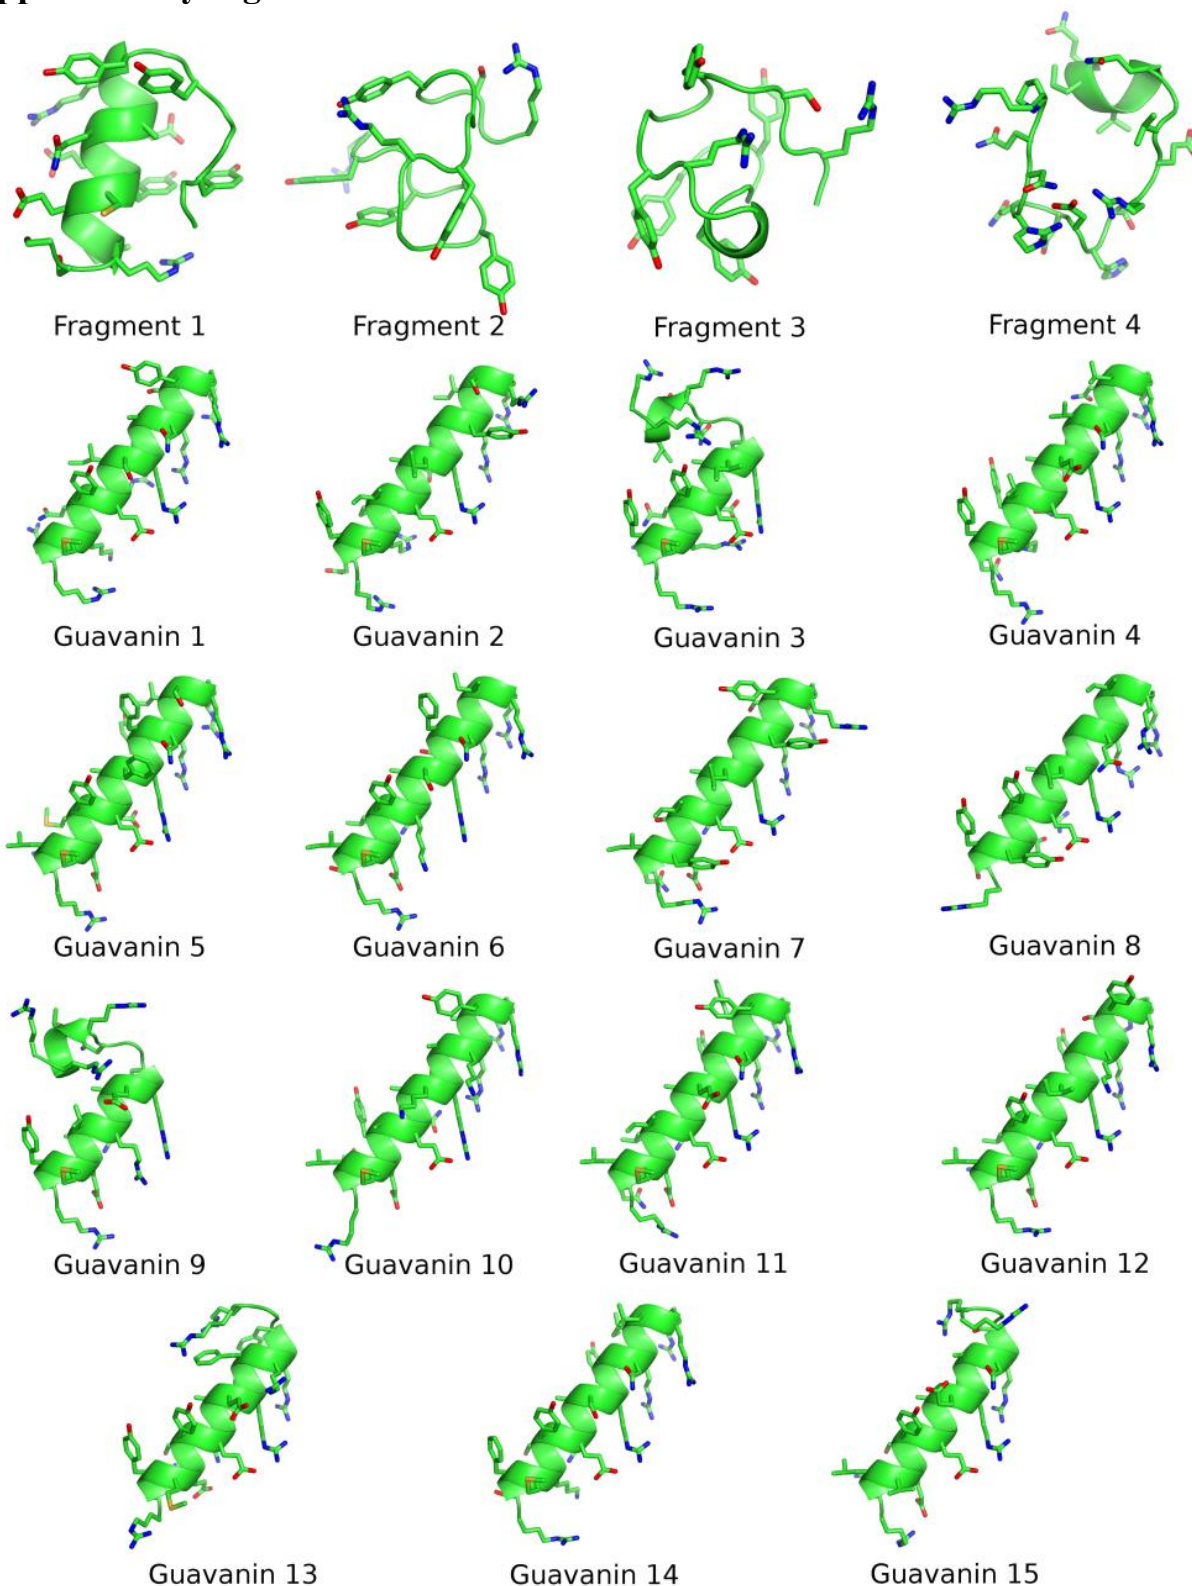

**Supplementary Figure 1. *Ab initio* models of the 4 fragments of Pg-AMP1 (Fragments 1-4) and the 15 best fitness designed guavanins.** Fragments 1 to 4 represents the best  $\alpha$ -helical propensity, higher net charge, hydrophobicity and hydrophobic moment, respectively. Their physicochemical properties are detailed on Supplementary Table 3. The four fragments present unusual predicted structures (Overall G-factors  $< -0.5$ ). From guavanins, 13 out of 15 were predicted to be in 100% of  $\alpha$ -helical structure. Guavanins 3 and 9 were predicted to have a loop in the C-terminal region, which is also considered unusual (Overall G-factors  $< -0.5$ ). The model assessments are summarized in Supplementary Table 2.

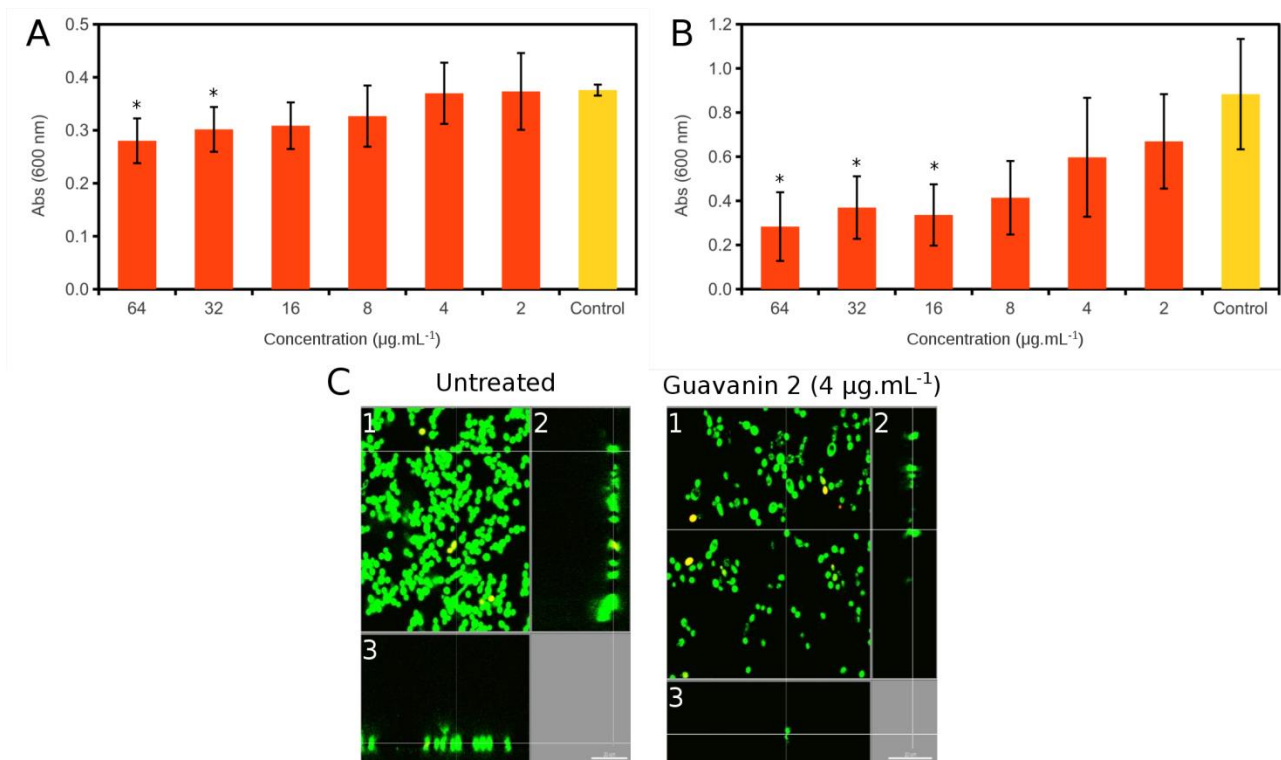

**Supplementary Figure 2. Antibiofilm activity of guavanin 2 against *C. albicans*.** (A) The peptide was not able to eliminate the planktonic cells, however, starting at  $16\ \mu\text{g.mL}^{-1}$ , it shows some effect with statistical significance ( $p < 0.05$ , Student's t-test). (B) Guavanin 2 was able to inhibit the formation of biofilm starting at  $32\ \mu\text{g.mL}^{-1}$  ( $p < 0.05$ , Student's t-test). The error bars indicates the standard deviation of three experimental replicates. (C) Preformed biofilm disruption by guavanin 2 ( $4\ \mu\text{g.mL}^{-1}$ ). The biofilms were grown in a flow cell system during 48h with BM2 media. After that, the peptide was applied during 24 h. *Candida* biofilms were stained green with Syto-9 which stains all cells and red with propidium iodide which stains dead cells red (merge shows as yellow to red). Reconstructions from the xy, yz and xz dimensions are represented in panels 1, 2 and 3, respectively. Scale bar = 40 and 30  $\mu\text{m}$  for untreated and treated samples, respectively.

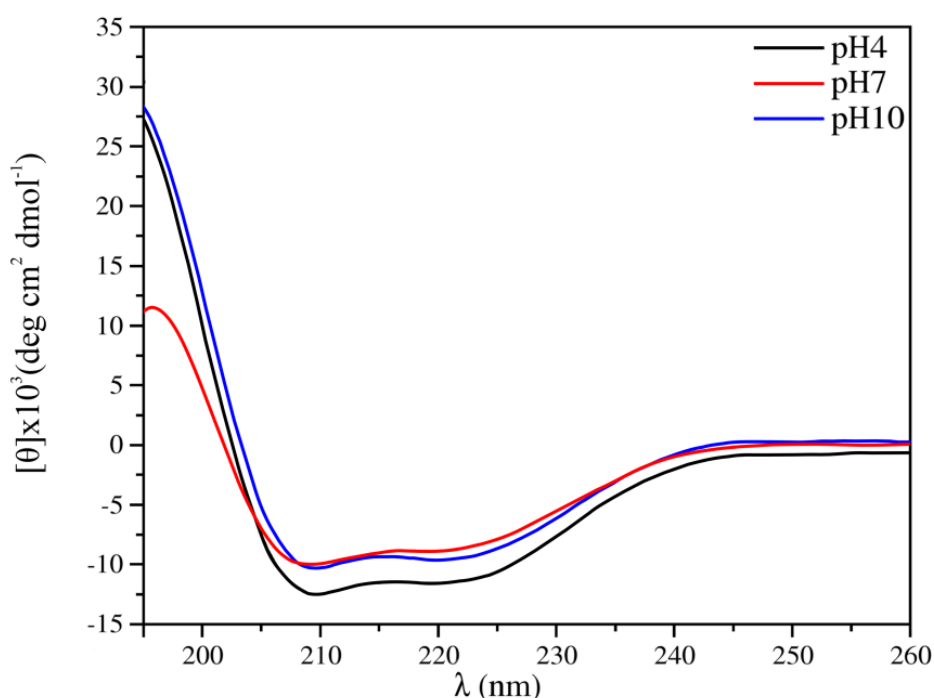

**Supplementary Figure 3. CD spectra of guavanin 2 at 25 °C in SDS (20mM) and pH 4, pH 7 and pH 10.** The  $\alpha$ -helical structure of guavanin 2 is more stable in acidic pH than neutral or alkaline one. It may occur due to the neutralization of arginine residues, avoiding the repulsion among them and stabilizing the structure.



## Supplementary Tables

**Supplementary Table 1. The best sequences of each parallel run of our genetic algorithm.**

| Guavanin | Sequence              | Fitness | Guavanin | Sequence               | Fitness |
|----------|-----------------------|---------|----------|------------------------|---------|
| 1        | RRGMKQYERISRDNRSYRR   | 0.393   | 51       | RAYMECLEQAERYGNRAYRR   | 0.324   |
| 2        | RQYMRQIEQALRYGYRISRR  | 0.390   | 52       | RQVMEYEQQLERYGNRSARR   | 0.323   |
| 3        | RKYMRQYEEAIRDGNRSIRR  | 0.390   | 53       | RQIRECYEQASRYGNRSYRR   | 0.323   |
| 4        | RQYMRYLEQAERYVNRNLRR  | 0.389   | 54       | RQYMEVYEQAERAGNRVYRR   | 0.322   |
| 5        | RKLMEYEEAFRYFNRSRR    | 0.386   | 55       | RSYMEQYEQAFRRGNRSYRR   | 0.322   |
| 6        | RSIMELYKQASRSFNRRGIRR | 0.379   | 56       | RHFMECYEQASRDGNRSLRR   | 0.321   |
| 7        | RQIYESIEQALRRGYRSYRR  | 0.378   | 57       | RKAMEQYEEAERDGAARSYRR  | 0.321   |
| 8        | RSYIEAYERALRKGQRGIRR  | 0.371   | 58       | RQYMKGYEQAERHAYSYRR    | 0.320   |
| 9        | RAYMEALRQAERLGNRTARR  | 0.370   | 59       | RQYMEQAEQAERDGNRSVRR   | 0.319   |
| 10       | RYLMEYAEQAKRDAKRAYRR  | 0.370   | 60       | RSIMEYYEQIERDGNRSYRR   | 0.318   |
| 11       | RQLMELIEQAERYGNRFYRR  | 0.368   | 61       | RYLKECYEQASRIGYRGLRR   | 0.318   |
| 12       | RKLMELYEQAIRYGKRSYRR  | 0.364   | 62       | RQGMEAYEQAERLGNRGIRR   | 0.318   |
| 13       | RRYMECYEQAERYFRRFGRR  | 0.362   | 63       | RQYMECYKQIYRYGNRSYRR   | 0.318   |
| 14       | RSFMKCYEQASRYGNRILRR  | 0.362   | 64       | RSYREYAEQALRYGNRGYRR   | 0.317   |
| 15       | RKLVECYERAERDANRSGRR  | 0.361   | 65       | RSGMEYYKQAFRAGYRVTRR   | 0.316   |
| 16       | RQLMECYEQAARRGARSYRR  | 0.359   | 66       | RSAMECYEKAERYWYRGSRR   | 0.316   |
| 17       | RYMMKIYEQAERYFNRRVGR  | 0.359   | 67       | RSYMECYEQASRKGNRSIRR   | 0.316   |
| 18       | RRYYEQLEQASRKGNRGFRR  | 0.356   | 68       | RQYMELYEQAMRYGNRGYRR   | 0.315   |
| 19       | RSVMEQYEQAARDAYSARR   | 0.355   | 69       | RQYIECYEQAARYGKRGYRR   | 0.315   |
| 20       | RQYMECIEKALRDGYRSYRR  | 0.352   | 70       | RQWAEYYEQQLERYGNRSYRR  | 0.315   |
| 21       | RYYMKCYKQAARYIYRGYRR  | 0.351   | 71       | RSYMEAYEQASRDGYRLYRR   | 0.314   |
| 22       | RSAYEYRRAYRDGNRGYRR   | 0.351   | 72       | RQYMEQYEQFERAGNRVYRR   | 0.314   |
| 23       | RYGMRQFEQASRDGNRSFRR  | 0.349   | 73       | RYYMEYYEKASRYGNRGIRR   | 0.313   |
| 24       | RKGYRGYEQALRYGKRYGRR  | 0.347   | 74       | RYYMEYYEQQLERYGNRLYRR  | 0.312   |
| 25       | RYGMRCLEEALRYGNRGYRR  | 0.347   | 75       | RQYMECYEQAARYGNRSYRR   | 0.309   |
| 26       | RQYREIIEQARRVGNRGARR  | 0.347   | 76       | RQYMEIYEQASRYGNRSYRR   | 0.307   |
| 27       | RQGMEVYERASRQGNRSLRR  | 0.346   | 77       | RQYMEQYEQAMRDGNRGYRR   | 0.306   |
| 28       | RRIMEQYEEAERDGNRVYRR  | 0.346   | 78       | RQYMEYYEQFSRLGNRSYRR   | 0.305   |
| 29       | RQVMEAYEQFYRDGNRAYRR  | 0.343   | 79       | RSGMKVYEQAERYGNRSYRR   | 0.304   |
| 30       | RQLMEQYEQAYRYAARGYRR  | 0.343   | 80       | RSAMECYEKASRDGNRGSRR   | 0.304   |
| 31       | RYIMEIYEQAIRKGNRSYRR  | 0.341   | 81       | RYYKEYEKAERIGNRGYRR    | 0.304   |
| 32       | RKYMELYEKASRRGYRGYRR  | 0.338   | 82       | RSYMECYEQAFRYGKRSSRR   | 0.303   |
| 33       | RQYLEQYENAERYIYRAYRR  | 0.333   | 83       | RQYMECYKQAERYGNRGYRR   | 0.302   |
| 34       | RQYMKCYEQAYRYGRRGYRR  | 0.332   | 84       | RSVMEYYEQAYRYGNRGSRR   | 0.301   |
| 35       | RQYAEQYEEAIRDGNRSVRR  | 0.331   | 85       | RQGMEAYEQAERYGNRSYRR   | 0.298   |
| 36       | RSYMEMLEQIERYGNRVGRR  | 0.330   | 86       | RAYQEAYEQAYRDGNRSYRR   | 0.298   |
| 37       | RQYMEFVEQAERYGRRSRR   | 0.330   | 87       | RSYMEQYEQASRKGYRSYRR   | 0.298   |
| 38       | RSYMEQYEEAIRRGYSYRR   | 0.329   | 88       | RSYAECYEQISRYGNRGYRR   | 0.298   |
| 39       | RQYMKYYEEAERYGNRAYRR  | 0.328   | 89       | RSYMEAYEQAERYGNRGYRR   | 0.296   |
| 40       | RAYMEYYEQFYRMGKRASRR  | 0.328   | 90       | SQRVEQYVRRLYDDYRNMYR   | 0.295   |
| 41       | RQYMEQVEQALRDGYRSGRR  | 0.327   | 91       | RSYIEQYEQQLERDGAARSYRR | 0.294   |
| 42       | RSYMESIEQALRIGNRSYRR  | 0.327   | 92       | SQRLERYVERSFDYRKSGR    | 0.292   |
| 43       | RSYMEIYEQASRAGNRAYRR  | 0.327   | 93       | RSYMEYYEQASRDGARGYRR   | 0.290   |
| 44       | RQYMEYYEQVFRAGYSARR   | 0.327   | 94       | SKRVGGQVRSYKRYRNYIR    | 0.272   |
| 45       | RYYMECYEQAVRYGRRWYRR  | 0.325   | 95       | GQRVEQLVERYGDDLRSVRR   | 0.267   |
| 46       | RQGMECYEQALRYGQRGIRR  | 0.325   | 96       | YQRVEQYVQRSYDAYRNYAR   | 0.259   |
| 47       | RSFMEQGEQAFRDGYRMYRR  | 0.325   | 97       | SQRVEQYVERYADGYRNYLR   | 0.258   |
| 48       | RKYMEIYEKASRYGNRSYRR  | 0.325   | 98       | YQRVEQYVQRYHDDLRSYSR   | 0.256   |
| 49       | RQYKEAYEEIYRYGNRMGRR  | 0.325   | 99       | YQRVEQYVQRSYDDYRNVGR   | 0.245   |
| 50       | RRYMECYEQAERDGNRMYRR  | 0.324   | 100      | TQRVEQYVERSDDKYRNLGR   | 0.245   |

**Supplementary Table 2. Structural assessments of ab initio models of the 4 Pg-AMP1 fragments and 15 best fitness guavanins**

| Peptide                   | DOPE      | ProSA<br>(Z-Score) | Ramachandran Plot (%) |                 | G-Factor |
|---------------------------|-----------|--------------------|-----------------------|-----------------|----------|
|                           |           |                    | Favored Regions       | Allowed Regions |          |
| Fragment 1 <sup>a</sup>   | -1228.738 | -1.22              | 100                   | 0               | -0.99    |
| Fragment 2 <sup>a,b</sup> | -337.424  | -1.96              | 28.6                  | 57.1            | -2.57    |
| Fragment 3 <sup>a,b</sup> | -489.954  | -1.27              | 71.4                  | 14.3            | -2.26    |
| Fragment 4 <sup>a,b</sup> | -703.175  | -1.18              | 78.6                  | 14.3            | -1.91    |
| Guavanin 1                | -1644.390 | -1.12              | 100                   | 0               | -0.09    |
| Guavanin 2                | -1891.091 | -0.73              | 100                   | 0               | -0.13    |
| Guavanin 3 <sup>a</sup>   | -1519.247 | -0.99              | 94.1                  | 5.9             | -0.80    |
| Guavanin 4                | -1950.491 | -1.25              | 100                   | 0               | 0.10     |
| Guavanin 5                | -1902.878 | -1.00              | 100                   | 0               | 0.01     |
| Guavanin 6                | -1633.499 | -0.48              | 100                   | 0               | -0.26    |
| Guavanin 7                | -1779.689 | -1.08              | 100                   | 0               | -0.17    |
| Guavanin 8                | -1563.839 | -1.14              | 100                   | 0               | -0.28    |
| Guavanin 9 <sup>a</sup>   | -1595.297 | -1.6               | 94.1                  | 5.9             | -0.76    |
| Guavanin 10               | -1825.547 | -1.3               | 100                   | 0               | 0.18     |
| Guavanin 11               | -1881.204 | -1.08              | 100                   | 0               | 0.03     |
| Guavanin 12               | -1851.237 | -1.23              | 100                   | 0               | -0.04    |
| Guavanin 13               | -1661.289 | -1.61              | 100                   | 0               | -0.26    |
| Guavanin 14               | -1741.938 | -0.79              | 100                   | 0               | -0.04    |
| Guavanin 15               | -1633.659 | -1.59              | 100                   | 0               | -0.26    |

<sup>a</sup> unusual structure according to G-Factor

<sup>b</sup> Structures with at least five gly or pro residues, which are not taken into account for Ramachandran Plot analysis.

**Supplementary Table 3** – Physicochemical properties and biological activity assessments of Pg-AMP1 fragments, guavanins 1-15 and magainin 2 (positive peptide control).

| Peptide                         | Sequence*               | F          | M            | H             | A            | Q  | MIC( $\mu\text{g.mL}^{-1}$ )** | Hemolysis ( $\mu\text{g.mL}^{-1}$ )*** |
|---------------------------------|-------------------------|------------|--------------|---------------|--------------|----|--------------------------------|----------------------------------------|
| Fragment 1 ( $\alpha$ -helix)   | SSRMECYEQAERYGYGGYGG    | n/a        | 0.089        | -0.262        | <b>0.553</b> | 0  | >200                           | >200                                   |
| Fragment 2 (net charge)         | RYGYGGYGGGRYGGGYGSGR    | n/a        | 0.100        | -0.190        | 0.739        | +4 | 200                            | 100                                    |
| Fragment 3 (hydrophobicity)     | YGYGGYGGGRYGGGYGSGRG    | n/a        | 0.027        | <b>-0.092</b> | 0.779        | +3 | >200                           | >200                                   |
| Fragment 4 (hydrophobic moment) | GQPVGQGVESHDDNRNQPR     | <b>n/a</b> | <b>0.300</b> | -0.503        | 0.829        | +2 | >200                           | >200                                   |
| Guavanin 1                      | RRGMKQYERISRDANRSYRR    | 0.393      | 0.589        | -0.773        | 0.379        | +7 | 200                            | >200                                   |
| Guavanin 2                      | RQYMRQIEQALRYGYRISRR    | 0.390      | 0.572        | -0.552        | 0.360        | +6 | 6.25                           | >200                                   |
| Guavanin 3                      | RKYMRQYEEAIRDGNRSIRR    | 0.390      | 0.587        | -0.664        | 0.384        | +5 | >200                           | >200                                   |
| Guavanin 4                      | RQYMRYLEQAERYVNRNLRR    | 0.389      | 0.560        | -0.627        | 0.350        | +5 | 100                            | >200                                   |
| Guavanin 5                      | RKLMEMYEEAFRYFNRSIRR    | 0.386      | 0.552        | -0.479        | 0.345        | +4 | 100                            | >200                                   |
| Guavanin 6                      | RSIMELYKQASRSFNRGIRR    | 0.379      | 0.568        | -0.477        | 0.380        | +6 | 100                            | >200                                   |
| Guavanin 7                      | RQIYESIEQALRRGYRSYRR    | 0.378      | 0.562        | -0.574        | 0.373        | +5 | 200                            | >200                                   |
| Guavanin 8                      | RSYYEAYERALRKGQRGIRR    | 0.371      | 0.558        | -0.598        | 0.371        | +6 | 100                            | >200                                   |
| Guavanin 9                      | RAYMEALRQAERLGNRTARR    | 0.370      | 0.516        | -0.553        | 0.298        | +5 | >200                           | >200                                   |
| Guavanin 10                     | RYLMEYAEQAKRDAKRAYRR    | 0.370      | 0.496        | -0.600        | 0.275        | +5 | 200                            | >200                                   |
| Guavanin 11                     | RQLMELIEQAERYGNRFYRR    | 0.368      | 0.544        | -0.489        | 0.368        | +3 | >200                           | >200                                   |
| Guavanin 12                     | RKLMELYEQAIRYGKRSYRR    | 0.364      | 0.526        | -0.544        | 0.346        | +6 | 25                             | >200                                   |
| Guavanin 13                     | RRYMECYEQAERYFRRFGRR    | 0.362      | 0.545        | -0.658        | 0.383        | +5 | 25                             | >200                                   |
| Guavanin 14                     | RSFMKCYEQASRYGNRILRR    | 0.362      | 0.551        | -0.498        | 0.395        | +6 | 12.5                           | >200                                   |
| Guavanin 15                     | RKLVECYERAERDANRSGRR    | 0.361      | 0.546        | -0.680        | 0.380        | +4 | 200                            | >200                                   |
| Magainin 2                      | GIGKFLHSAKKFGKAFVGEIMNS | 0.168      | 0.286        | -0.036        | 0.489        | +5 | 100                            | >200                                   |

\*All peptides are amidated.

\*\* MICs evaluated on SPOT-synthesized peptide samples of unpurified crude synthetic peptide (~70% purity) against the bioluminescent engineered strain of the Gram-Negative bacteria *P. aeruginosa*.

\*\*\*100% of hemolysis was not observed.

F, fitness;  $\mu$ , hydrophobic moment; H, hydrophobicity;  $\alpha$ ,  $\alpha$ -helix propensity; Q, net charge.

**Supplementary Table 4.** Amino acid probability distributions. This distribution was based on the frequency of occurrence of each amino acid according to the Antimicrobial Peptides Database (APD – Accessed on April, 2013) (36). Cysteine, aspartic acid, glutamic acid, glycine and proline residues were removed from the set and the probability distribution was adjusted for remaining residues.

| <b>Residue</b> | <b>Distribution (%)</b> | <b>Residue</b> | <b>Distribution (%)</b> | <b>Residue</b> | <b>Distribution (%)</b> |
|----------------|-------------------------|----------------|-------------------------|----------------|-------------------------|
| A              | 11.092                  | L              | 11.869                  | S              | 8.281                   |
| F              | 5.624                   | M              | 1.597                   | T              | 6.132                   |
| H              | 2.925                   | N              | 5.341                   | V              | 8.111                   |
| I              | 8.563                   | Q              | 3.207                   | W              | 2.247                   |
| K              | 13.494                  | R              | 7.984                   | Y              | 3.533                   |
